# Supplementary material
Source: Springer Nature journal article supplement (https://www.springermedizin.de/resource/supplementary/12998_2013_113_MOESM4_ESM.pdf/9680228)
Supplement: MOESM4 [file 9680228]

Benefits (\$AUD) Millions

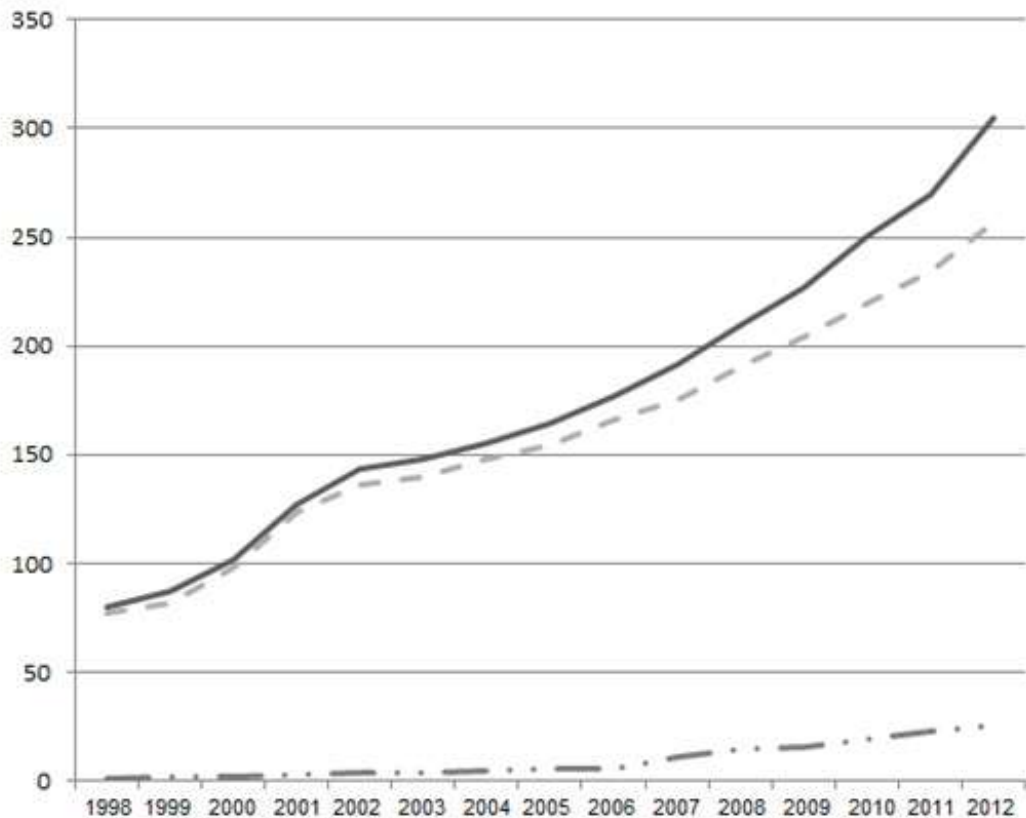

- - Chiropractic Benefits
- Physiotherapy Benefits
- · · Osteopathic Benefits

Time
